# Supplementary material for: Assessment of Cardiovascular Risk Factors in Patients with Juvenile Idiopathic Arthritis
Source: MDPI journal article supplement (doi:10.3390/nu15071700), 2023-03-30
Supplement: s1 [file s1]

**Table S1. Numbers of cases by good\* and bad eating habits (without division into control and study groups)**

\* fruit or vegetables daily, fish >= 1 time/week, sweetened drinks less than 1 time/week

|             |          | Better eating habits (N=10) |         | Worse eating habits (N=72) |         | p     |
|-------------|----------|-----------------------------|---------|----------------------------|---------|-------|
|             |          | Number                      | Percent | Number                     | Percent |       |
| Group       | Control  | 3                           | 30,00%  | 34                         | 47,22%  | 0.492 |
|             | Study    | 7                           | 70,00%  | 38                         | 52,78%  |       |
| Sex         | F        | 8                           | 80,00%  | 48                         | 66,67%  | 0.237 |
|             | M        | 2                           | 20,00%  | 24                         | 33,33%  |       |
| RCA centile | < 25     | 5                           | 50,00%  | 29                         | 40,28%  | 0.504 |
|             | 25 – 74  | 5                           | 50,00%  | 29                         | 40,28%  |       |
|             | 75 – 94  | 0                           | 0,00%   | 10                         | 13,89%  |       |
|             | >= 95    | 0                           | 0,00%   | 4                          | 5,56%   |       |
| RCA centile | < 75 cc  | 10                          | 100,00% | 58                         | 80,56%  | 0.278 |
|             | >= 75 cc | 0                           | 0,00%   | 14                         | 19,44%  |       |
| LCA centile | < 25     | 5                           | 50,00%  | 25                         | 34,72%  | 0.468 |
|             | 25 – 74  | 5                           | 50,00%  | 33                         | 45,83%  |       |
|             | 75 – 94  | 0                           | 0,00%   | 10                         | 13,89%  |       |
|             | >= 95    | 0                           | 0,00%   | 4                          | 5,56%   |       |
| LCA centile | < 75 cc  | 10                          | 100,00% | 58                         | 80,56%  | 0.279 |
|             | >= 75 cc | 0                           | 0,00%   | 14                         | 19,44%  |       |
| cIMT        | <95      | 10                          | 100,00% | 68                         | 94,44%  | 1.000 |
|             | >=95     | 0                           | 0,00%   | 4                          | 5,56%   |       |
| Apgar score | 1        | 0                           | 0,00%   | 0                          | 0,00%   | 0.491 |
|             | 2        | 0                           | 0,00%   | 1                          | 1,39%   |       |

|                                    |                       |    |         |    |         |       |
|------------------------------------|-----------------------|----|---------|----|---------|-------|
|                                    | 3                     | 0  | 0,00%   | 0  | 0,00%   |       |
|                                    | 4                     | 0  | 0,00%   | 0  | 0,00%   |       |
|                                    | 5                     | 0  | 0,00%   | 0  | 0,00%   |       |
|                                    | 6                     | 1  | 10,00%  | 0  | 0,00%   |       |
|                                    | 7                     | 0  | 0,00%   | 1  | 1,39%   |       |
|                                    | 8                     | 2  | 20,00%  | 8  | 11,11%  |       |
|                                    | 9                     | 2  | 20,00%  | 22 | 30,56%  |       |
|                                    | 10                    | 5  | 50,00%  | 40 | 55,56%  |       |
| Type of weight<br>after childbirth | AGA                   | 9  | 90,00%  | 65 | 90,28%  | 0.378 |
|                                    | LGA                   | 0  | 0,00%   | 5  | 6,94%   |       |
|                                    | SGA                   | 1  | 10,00%  | 2  | 2,78%   |       |
| BMI                                | Underweight           | 0  | 0,00%   | 4  | 5,56%   | 0.486 |
|                                    | Appropriate body mass | 5  | 50,00%  | 47 | 65,28%  |       |
|                                    | Overweight            | 3  | 30,00%  | 15 | 20,83%  |       |
|                                    | Obesity               | 2  | 20,00%  | 6  | 8,33%   |       |
| BMI                                | normal                | 4  | 40,00%  | 47 | 65,28%  | 0.231 |
|                                    | abnormal              | 6  | 60,00%  | 25 | 34,72%  |       |
| BMI < 85                           | YES                   | 5  | 50,00%  | 51 | 70,83%  | 0.335 |
|                                    | NO                    | 5  | 50,00%  | 21 | 29,17%  |       |
| RR                                 | <90 percentil         | 10 | 100,00% | 71 | 98,61%  | 0.932 |
|                                    | 90-95 percentil       | 0  | 0,00%   | 1  | 1,39%   |       |
|                                    | >95 percentil         | 0  | 0,00%   | 0  | 0,00%   |       |
| Ideal<br>cardiovascular<br>health  | YES                   | 1  | 10,00%  | 0  | 0,00%   | 0.245 |
|                                    | NO                    | 9  | 90,00%  | 72 | 100,00% |       |
| Passive smoking                    | NO                    | 8  | 80,00%  | 60 | 83,33%  | 0.852 |

|                                          |                                              |    |         |    |        |       |
|------------------------------------------|----------------------------------------------|----|---------|----|--------|-------|
|                                          | YES                                          | 2  | 20,00%  | 12 | 16,67% |       |
| Smoking parents                          | NO                                           | 9  | 90,00%  | 62 | 86,11% | 0.874 |
|                                          | YES                                          | 1  | 10,00%  | 10 | 13,89% |       |
| Family history of cardiovascular disease | NO                                           | 8  | 80,00%  | 36 | 50,00% | 0.149 |
|                                          | YES                                          | 2  | 20,00%  | 36 | 50,00% |       |
| ESR                                      | <10mm/1h                                     | 3  | 30,00%  | 24 | 33,33% | 0.557 |
|                                          | >10 mm/1h                                    | 4  | 40,00%  | 14 | 19,44% |       |
| Uric acid                                | <4mg/L                                       | 6  | 60,00%  | 38 | 52,78% | 0.929 |
|                                          | >=4mg/L                                      | 4  | 40,00%  | 34 | 47,22% |       |
| Fasting glucose                          | <100 mg/L                                    | 10 | 100,00% | 68 | 94,44% | 1.000 |
|                                          | >=100mg/L                                    | 0  | 0,00%   | 4  | 5,56%  |       |
| HDL                                      | <40 mg/dl                                    | 0  | 0,00%   | 7  | 9,72%  | 0.528 |
|                                          | >45 mg/dl                                    | 9  | 90,00%  | 55 | 76,39% |       |
|                                          | 40-45 mg/dl                                  | 1  | 10,00%  | 10 | 13,89% |       |
| HDL                                      | <40mg/dl                                     | 0  | 0,00%   | 7  | 9,72%  | 0.670 |
|                                          | >45 mg/dl<br>40-45 mg/dl                     | 10 | 100,00% | 65 | 90,28% |       |
| LDL                                      | <110 mg/dl                                   | 4  | 40,00%  | 42 | 58,33% | 0.383 |
|                                          | 110-129mg/dl                                 | 2  | 20,00%  | 15 | 20,83% |       |
|                                          | >130 mg/dl                                   | 4  | 40,00%  | 15 | 20,83% |       |
| TC                                       | <170 mg/dl                                   | 5  | 50,00%  | 45 | 62,50% | 0.856 |
|                                          | 170-199 mg/dl                                | 4  | 40,00%  | 21 | 29,17% |       |
|                                          | >200 mg/dl                                   | 1  | 10,00%  | 6  | 8,33%  |       |
| Triglycerides                            | 0-9 years <75 mg/dl<br>10-19 years <90 mg/dl | 3  | 30,00%  | 43 | 59,72% | 0.197 |

|                                                                |                                                   |   |        |    |        |       |
|----------------------------------------------------------------|---------------------------------------------------|---|--------|----|--------|-------|
|                                                                | 0-9 years 75-99 mg/dl<br>10-19 years 90-129 mg/dl | 4 | 40,00% | 15 | 20,83% |       |
|                                                                | 0-9 years >100 mg/dl<br>10-19 years >130 mg/dl    | 3 | 30,00% | 14 | 19,44% |       |
| Lipid profile                                                  | normal                                            | 1 | 10,00% | 18 | 25,00% | 0.513 |
|                                                                | abnormal                                          | 9 | 90,00% | 54 | 75,00% |       |
| CRP                                                            | <5mg/L                                            | 7 | 70,00% | 34 | 47,22% | 0.860 |
|                                                                | >=5mg/L                                           | 0 | 0,00%  | 4  | 5,56%  |       |
| RF                                                             | minus                                             | 7 | 70,00% | 35 | 48,61% | 0.956 |
|                                                                | plus                                              | 0 | 0,00%  | 3  | 4,17%  |       |
| painful conditions                                             | No                                                | 6 | 60,00% | 30 | 41,67% | 0.916 |
|                                                                | Yes                                               | 1 | 10,00% | 8  | 11,11% |       |
| VAS scale                                                      | 0                                                 | 7 | 70,00% | 30 | 41,67% | 0.408 |
|                                                                | 1                                                 | 0 | 0,00%  | 5  | 6,94%  |       |
|                                                                | 2                                                 | 0 | 0,00%  | 3  | 4,17%  |       |
| physical activity                                              | No                                                | 4 | 40,00% | 19 | 26,39% | 0.625 |
|                                                                | any kind of                                       | 6 | 60,00% | 53 | 73,61% |       |
| physical activity                                              | No                                                | 5 | 50,00% | 43 | 59,72% | 0.808 |
|                                                                | >= 3 days/week                                    | 5 | 50,00% | 29 | 40,28% |       |
| number of days<br>with physical<br>activity >60 min<br>per day | 0                                                 | 4 | 40,00% | 19 | 26,39% | 0.077 |
|                                                                | 1                                                 | 1 | 10,00% | 10 | 13,89% |       |
|                                                                | 2                                                 | 0 | 0,00%  | 14 | 19,44% |       |
|                                                                | 3                                                 | 1 | 10,00% | 8  | 11,11% |       |
|                                                                | 4                                                 | 0 | 0,00%  | 7  | 9,72%  |       |
|                                                                | 5                                                 | 0 | 0,00%  | 4  | 5,56%  |       |

|                                           |       |    |         |    |         |       |
|-------------------------------------------|-------|----|---------|----|---------|-------|
|                                           | 6     | 1  | 10,00%  | 0  | 0,00%   |       |
|                                           | 7     | 3  | 30,00%  | 10 | 13,89%  |       |
| Physical activity 7 days a week > 60 min  | No    | 7  | 70,00%  | 62 | 86,11%  | 0.398 |
|                                           | Yes   | 3  | 30,00%  | 10 | 13,89%  |       |
| Sedetary screen time before Covid pandemy | < 3h  | 6  | 60,00%  | 18 | 25,00%  | 0.049 |
|                                           | >= 3h | 4  | 40,00%  | 54 | 75,00%  |       |
| Sedetary screen time in Covid pandemy     | < 3h  | 0  | 0,00%   | 0  | 0,00%   | ----- |
|                                           | >= 3h | 10 | 100,00% | 72 | 100,00% |       |

cIMT—carotid intima-media thickness; BMI—body mass index; ESR—erythrocytes sedimentation rate; CRP—C-reactive protein; RCA—right carotid artery; LCA—left carotid artery. 1—Abnormal BMI encompasses patients with one of the following: underweight (<5th percentile); overweight (>85th percentile); obesity (>95th percentile); 2—Abnormal lipid panel encompasses patients with at least one of the following: total cholesterol  $\geq$  170 mg/dL; high-density lipoprotein  $\leq$  40 mg/dL; low-density lipoprotein  $\geq$  110 mg/dL; triglycerides 0-9 years >100 mg/dl, 10-19 years >130 mg/dl; Vas- Visual Analog Scale of pain; AGA- appropriate for gestational age; LGA –large for gestational age; SGA-small for gestational age;

**Table S2. Numbers of cases in the study group divided according to good\* and bad eating habits**

*\* fruit or vegetables daily, fish  $\geq$  1 time/week, sweetened drinks less than 1 time/week*

|     |   | Better eating habits (N=7) |         | Worse eating habits (N=38) |         | p     |
|-----|---|----------------------------|---------|----------------------------|---------|-------|
|     |   | Number                     | Percent | Number                     | Percent |       |
| Sex | F | 7                          | 100,00% | 26                         | 68,42%  | 0.204 |

|                |          |   |         |    |        |       |
|----------------|----------|---|---------|----|--------|-------|
|                | M        | 0 | 0,00%   | 12 | 31,58% |       |
| RCA centile    | < 25     | 5 | 57,14%  | 18 | 47,37% | 0.616 |
|                | 25 – 74  | 3 | 42,86%  | 13 | 34,21% |       |
|                | 75 – 94  | 0 | 0,00%   | 3  | 7,89%  |       |
|                | >= 95    | 0 | 0,00%   | 4  | 10,53% |       |
| RCA centile    | < 75 cc  | 7 | 100,00% | 31 | 81,58% | 0.504 |
|                | >= 75 cc | 0 | 0,00%   | 7  | 18,42% |       |
| LCA centile    | < 25     | 4 | 57,14%  | 14 | 36,84% | 0.593 |
|                | 25 – 74  | 3 | 42,86%  | 17 | 44,74% |       |
|                | 75 – 94  | 0 | 0,00%   | 3  | 7,89%  |       |
|                | >= 95    | 0 | 0,00%   | 4  | 10,53% |       |
| LCA centile    | < 75 cc  | 7 | 100,00% | 31 | 81,58% | 0.504 |
|                | >= 75 cc | 0 | 0,00%   | 7  | 18,42% |       |
| cIMT           | <95      | 7 | 100,00% | 34 | 89,47% | 0.860 |
|                | >=95     | 0 | 0,00%   | 4  | 10,53% |       |
| Apgar score    | 1        | 0 | 0,00%   | 0  | 0,00%  | 0.641 |
|                | 2        | 0 | 0,00%   | 0  | 0,00%  |       |
|                | 3        | 0 | 0,00%   | 0  | 0,00%  |       |
|                | 4        | 0 | 0,00%   | 0  | 0,00%  |       |
|                | 5        | 0 | 0,00%   | 0  | 0,00%  |       |
|                | 6        | 1 | 14,29%  | 0  | 0,00%  |       |
|                | 7        | 0 | 0,00%   | 1  | 2,63%  |       |
|                | 8        | 1 | 14,29%  | 2  | 5,26%  |       |
|                | 9        | 1 | 14,29%  | 12 | 31,58% |       |
|                | 10       | 4 | 57,14%  | 23 | 60,53% |       |
| Type of weight | AGA      | 7 | 100,00% | 34 | 89,47% | 0.667 |

|                                          |                       |   |         |    |         |       |
|------------------------------------------|-----------------------|---|---------|----|---------|-------|
| after childbirth                         | LGA                   | 0 | 0,00%   | 3  | 7,89%   |       |
|                                          | SGA                   | 0 | 0,00%   | 1  | 2,63%   |       |
| BMI                                      | Underweight           | 0 | 0,00%   | 4  | 10,53%  | 0.613 |
|                                          | Appropriate body mass | 3 | 42,86%  | 20 | 52,63%  |       |
|                                          | Overweight            | 2 | 28,57%  | 9  | 23,68%  |       |
|                                          | Obesity               | 2 | 28,57%  | 5  | 13,16%  |       |
| BMI                                      | normal                | 2 | 28,57%  | 20 | 52,63%  | 0.448 |
|                                          | abnormal              | 5 | 71,43%  | 18 | 47,37%  |       |
| BMI < 85                                 | YES                   | 2 | 28,57%  | 24 | 63,16%  | 0.198 |
|                                          | NO                    | 5 | 71,43%  | 14 | 36,84%  |       |
| RR                                       | <90 percentil         | 7 | 100,00% | 38 | 100,00% | ----- |
|                                          | 90-95 percentil       | 0 | 0,00%   | 0  | 0,00%   |       |
|                                          | >95 percentil         | 0 | 0,00%   | 0  | 0,00%   |       |
| Ideal cardiovascular health              | YES                   | 1 | 14,29%  | 0  | 0,00%   | 0.336 |
|                                          | NO                    | 6 | 85,71%  | 38 | 100,00% |       |
| Passive smoking                          | NO                    | 6 | 85,71%  | 30 | 78,95%  | 0.916 |
|                                          | YES                   | 1 | 14,29%  | 8  | 21,05%  |       |
| Smoking parents                          | NO                    | 6 | 85,71%  | 31 | 81,58%  | 0.783 |
|                                          | YES                   | 1 | 14,29%  | 7  | 18,42%  |       |
| Family history of cardiovascular disease | NO                    | 6 | 85,71%  | 19 | 50,00%  | 0.182 |
|                                          | YES                   | 1 | 14,29%  | 19 | 50,00%  |       |
| ESR                                      | <10mm/1h              | 3 | 42,86%  | 24 | 63,16%  | 0.557 |
|                                          | >10 mm/1h             | 4 | 57,14%  | 14 | 36,84%  |       |
| Uric acid                                | <4mg/L                | 4 | 57,14%  | 21 | 55,26%  | 0.747 |

|                 |                                                   |   |         |    |        |       |
|-----------------|---------------------------------------------------|---|---------|----|--------|-------|
|                 | >=4mg/L                                           | 3 | 42,86%  | 17 | 44,74% |       |
| Fasting glucose | <100 mg/L                                         | 7 | 100,00% | 35 | 92,11% | 0.956 |
|                 | >=100mg/L                                         | 0 | 0,00%   | 3  | 7,89%  |       |
| HDL             | <40 mg/dl                                         | 0 | 0,00%   | 5  | 13,16% | 0.576 |
|                 | >45 mg/dl                                         | 6 | 85,71%  | 27 | 71,05% |       |
|                 | 40-45 mg/dl                                       | 1 | 14,29%  | 6  | 15,79% |       |
| HDL             | <40mg/dl                                          | 0 | 0,00%   | 5  | 13,16% | 0.716 |
|                 | >45 mg/dl                                         | 7 | 100,00% | 33 | 86,84% |       |
|                 | 40-45 mg/dl                                       |   |         |    |        |       |
| LDL             | <110 mg/dl                                        | 4 | 57,14%  | 23 | 60,53% | 0.896 |
|                 | 110-129mg/dl                                      | 1 | 14,29%  | 7  | 18,42% |       |
|                 | >130 mg/dl                                        | 2 | 28,57%  | 8  | 21,05% |       |
| TC              | <170 mg/dl                                        | 4 | 57,14%  | 24 | 63,16% | 0.941 |
|                 | 170-199 mg/dl                                     | 2 | 28,57%  | 10 | 26,32% |       |
|                 | >200 mg/dl                                        | 1 | 14,29%  | 4  | 10,53% |       |
| Triglycerides   | 0-9 years <75 mg/dl<br>10-19 years <90 mg/dl      | 2 | 28,57%  | 22 | 57,89% | 0.355 |
|                 | 0-9 years 75-99 mg/dl<br>10-19 years 90-129 mg/dl | 2 | 28,57%  | 7  | 18,42% |       |
|                 | 0-9 years >100 mg/dl<br>10-19 years >130 mg/dl    | 3 | 42,86%  | 9  | 23,68% |       |
| Lipid profile   | normal                                            | 1 | 14,29%  | 9  | 23,68% | 0.956 |
|                 | abnormal                                          | 6 | 85,71%  | 29 | 76,32% |       |
| CRP             | <5mg/L                                            | 7 | 100,00% | 34 | 89,47% | 0.860 |
|                 | >=5mg/L                                           | 0 | 0,00%   | 4  | 10,53% |       |
| RF              | minus                                             | 7 | 100,00% | 35 | 92,11% | 0.956 |



|                                                                |                |   |        |    |        |       |
|----------------------------------------------------------------|----------------|---|--------|----|--------|-------|
|                                                                | plus           | 0 | 0,00%  | 3  | 7,89%  |       |
| painful conditions                                             | No             | 6 | 85,71% | 30 | 78,95% | 0.916 |
|                                                                | Yes            | 1 | 14,29% | 8  | 21,05% |       |
| VAS scale                                                      | 0              | 6 | 85,71% | 30 | 78,95% | 0.541 |
|                                                                | 1              | 0 | 0,00%  | 5  | 13,16% |       |
|                                                                | 2              | 1 | 14,29% | 3  | 7,89%  |       |
| physical activity                                              | No             | 4 | 57,14% | 12 | 31,58% | 0.385 |
|                                                                | any kind of    | 3 | 42,86% | 26 | 68,42% |       |
| physical activity                                              | No             | 5 | 71,43% | 21 | 55,26% | 0.704 |
|                                                                | >= 3 days/week | 2 | 28,57% | 17 | 44,74% |       |
| number of days<br>with physical<br>activity >60 min<br>per day | 0              | 4 | 57,14% | 12 | 31,58% | 0.656 |
|                                                                | 1              | 1 | 14,29% | 3  | 7,89%  |       |
|                                                                | 2              | 0 | 0,00%  | 6  | 15,79% |       |
|                                                                | 3              | 0 | 0,00%  | 6  | 15,79% |       |
|                                                                | 4              | 0 | 0,00%  | 4  | 10,53% |       |
|                                                                | 5              | 0 | 0,00%  | 1  | 2,63%  |       |
|                                                                | 6              | 0 | 0,00%  | 0  | 0,00%  |       |
|                                                                | 7              | 2 | 28,57% | 6  | 15,79% |       |
| Physical activity 7<br>days a week > 60<br>min                 | No             | 5 | 71,43% | 32 | 84,21% | 0.783 |
|                                                                | Yes            | 2 | 28,57% | 6  | 15,79% |       |
| Sedetary screen<br>time before Covid<br>pandemy                | < 3h           | 4 | 57,14% | 10 | 26,32% | 0.240 |
|                                                                | >= 3h          | 3 | 42,86% | 28 | 73,68% |       |
| Sedetary screen                                                | < 3h           | 0 | 0,00%  | 0  | 0,00%  | ----- |

|                          |       |   |         |    |         |  |
|--------------------------|-------|---|---------|----|---------|--|
| time in Covid<br>pandemy | >= 3h | 7 | 100,00% | 38 | 100,00% |  |
|--------------------------|-------|---|---------|----|---------|--|

cIMT—carotid intima-media thickness; BMI—body mass index; ESR—erythrocytes sedimentation rate; CRP—C-reactive protein; RCA—right carotid artery; LCA—left carotid artery. 1—Abnormal BMI encompasses patients with one of the following: underweight (<5th percentile); overweight (>85th percentile); obesity (>95th percentile); 2—Abnormal lipid panel encompasses patients with at least one of the following: total cholesterol  $\geq$  170 mg/dL; high-density lipoprotein  $\leq$ 40 mg/dL; low-density lipoprotein  $\geq$  110 mg/dL; triglycerides 0-9 years >100 mg/dl, 10-19 years >130 mg/dl; Vas- Visual Analog Scale of pain; AGA- appropriate for gestational age; LGA –large for gestational age; SGA-small for gestational age;

**Table S3. Relationships between pain and other parameters in the study group**

|             |          | Pain = YES (N=9) |         | Pain = NO (N=36) |         | p     |
|-------------|----------|------------------|---------|------------------|---------|-------|
|             |          | Number           | Percent | Number           | Percent |       |
| Sex         | F        | 7                | 77,78%  | 26               | 72,22%  | 0.933 |
|             | M        | 2                | 22,22%  | 10               | 27,78%  |       |
| RCA centile | < 25     | 5                | 55,56%  | 17               | 47,22%  | 0.786 |
|             | 25 – 74  | 2                | 22,22%  | 14               | 38,89%  |       |
|             | 75 – 94  | 1                | 11,11%  | 2                | 5,56%   |       |
|             | >= 95    | 1                | 11,11%  | 3                | 8,33%   |       |
| RCA centile | < 75 cc  | 7                | 77,78%  | 31               | 86,11%  | 0.916 |
|             | >= 75 cc | 2                | 22,22%  | 5                | 13,89%  |       |
| LCA centile | < 25     | 2                | 22,22%  | 16               | 44,44%  | 0.660 |
|             | 25 – 74  | 5                | 55,56%  | 15               | 41,67%  |       |
|             | 75 – 94  | 1                | 11,11%  | 2                | 5,56%   |       |
|             | >= 95    | 1                | 11,11%  | 3                | 8,33%   |       |
| LCA centile | < 75 cc  | 7                | 77,78%  | 31               | 86,11%  | 0.916 |

|                                    |                       |   |         |    |         |       |
|------------------------------------|-----------------------|---|---------|----|---------|-------|
|                                    | >= 75 cc              | 2 | 22,22%  | 5  | 13,89%  |       |
| cIMT                               | <95                   | 8 | 88,89%  | 33 | 91,67%  | 0.694 |
|                                    | >=95                  | 1 | 11,11%  | 3  | 8,33%   |       |
| Apgar score                        | 1                     | 0 | 0,00%   | 0  | 0,00%   | 0.987 |
|                                    | 2                     | 0 | 0,00%   | 0  | 0,00%   |       |
|                                    | 3                     | 0 | 0,00%   | 0  | 0,00%   |       |
|                                    | 4                     | 0 | 0,00%   | 0  | 0,00%   |       |
|                                    | 5                     | 0 | 0,00%   | 0  | 0,00%   |       |
|                                    | 6                     | 0 | 0,00%   | 1  | 2,78%   |       |
|                                    | 7                     | 0 | 0,00%   | 1  | 2,78%   |       |
|                                    | 8                     | 0 | 0,00%   | 3  | 8,33%   |       |
|                                    | 9                     | 4 | 44,44%  | 9  | 25,00%  |       |
|                                    | 10                    | 5 | 55,56%  | 22 | 61,11%  |       |
| Type of weight<br>after childbirth | AGA                   | 9 | 100,00% | 33 | 91,67%  | 0.669 |
|                                    | LGA                   | 0 | 0,00%   | 3  | 8,33%   |       |
|                                    | SGA                   | 0 | 0,00%   | 0  | 0,00%   |       |
| BMI                                | Underweight           | 1 | 11,11%  | 3  | 8,33%   | 0.695 |
|                                    | Appropriate body mass | 3 | 33,33%  | 20 | 55,56%  |       |
|                                    | Overweight            | 3 | 33,33%  | 8  | 22,22%  |       |
|                                    | Obesity               | 2 | 22,22%  | 5  | 13,89%  |       |
| BMI                                | normal                | 3 | 33,33%  | 19 | 52,78%  | 0.502 |
|                                    | abnormal              | 6 | 66,67%  | 17 | 47,22%  |       |
| BMI < 85                           | YES                   | 4 | 44,44%  | 23 | 63,89%  | 0.493 |
|                                    | NO                    | 5 | 55,56%  | 13 | 36,11%  |       |
| RR                                 | <90 percentil         | 9 | 100,00% | 36 | 100,00% | ----- |
|                                    | 90-95 percentil       | 0 | 0,00%   | 0  | 0,00%   |       |

|                                          |               |   |         |    |        |        |
|------------------------------------------|---------------|---|---------|----|--------|--------|
|                                          | >95 percentil | 0 | 0,00%   | 0  | 0,00%  |        |
| Ideal cardiovascular health              | YES           | 0 | 0,00%   | 1  | 2,78%  | 0.613  |
|                                          | NO            | 9 | 100,00% | 35 | 97,22% |        |
| Passive smoking                          | NO            | 7 | 77,78%  | 29 | 80,56% | 0.780  |
|                                          | YES           | 2 | 22,22%  | 7  | 19,44% |        |
| Smoking parents                          | NO            | 7 | 77,78%  | 30 | 83,33% | 0.920  |
|                                          | YES           | 2 | 22,22%  | 6  | 16,67% |        |
| Family history of cardiovascular disease | NO            | 3 | 33,33%  | 22 | 61,11% | 0.261  |
|                                          | YES           | 6 | 66,67%  | 14 | 38,89% |        |
| ESR                                      | <10mm/1h      | 5 | 55,56%  | 22 | 61,11% | 0.938  |
|                                          | >10 mm/1h     | 4 | 44,44%  | 14 | 38,89% |        |
| Uric acid                                | <4mg/L        | 4 | 44,44%  | 21 | 58,33% | 0.707  |
|                                          | >=4mg/L       | 5 | 55,56%  | 15 | 41,67% |        |
| Fasting glucose                          | <100 mg/L     | 8 | 88,89%  | 34 | 94,44% | 0.882  |
|                                          | >=100mg/L     | 1 | 11,11%  | 2  | 5,56%  |        |
| HDL                                      | <40 mg/dl     | 1 | 11,11%  | 4  | 11,11% | 0.917  |
|                                          | >45 mg/dl     | 7 | 77,78%  | 26 | 72,22% |        |
|                                          | 40-45 mg/dl   | 1 | 11,11%  | 6  | 16,67% |        |
| HDL                                      | <40mg/dl      | 1 | 11,11%  | 4  | 11,11% | >0.999 |
|                                          | >45 mg/dl     | 8 | 88,89%  | 32 | 88,89% |        |
|                                          | 40-45 mg/dl   |   |         |    |        |        |
| LDL                                      | <110 mg/dl    | 5 | 55,56%  | 22 | 61,11% | 0.334  |
|                                          | 110-129mg/dl  | 3 | 33,33%  | 5  | 13,89% |        |

|                                                                |                                                   |   |         |    |        |       |
|----------------------------------------------------------------|---------------------------------------------------|---|---------|----|--------|-------|
|                                                                | >130 mg/dl                                        | 1 | 11,11%  | 9  | 25,00% |       |
| TC                                                             | <170 mg/dl                                        | 5 | 55,56%  | 23 | 63,89% | 0.875 |
|                                                                | 170-199 mg/dl                                     | 3 | 33,33%  | 9  | 25,00% |       |
|                                                                | >200 mg/dl                                        | 1 | 11,11%  | 4  | 11,11% |       |
| Triglycerides                                                  | 0-9 years <75 mg/dl<br>10-19 years <90 mg/dl      | 6 | 66,67%  | 18 | 50,00% | 0.520 |
|                                                                | 0-9 years 75-99 mg/dl<br>10-19 years 90-129 mg/dl | 0 | 0,00%   | 9  | 25,00% |       |
|                                                                | 0-9 years >100 mg/dl<br>10-19 years >130 mg/dl    | 3 | 33,33%  | 9  | 25,00% |       |
| Lipid profile                                                  | normal                                            | 2 | 22,22%  | 8  | 22,22% | 0.654 |
|                                                                | abnormal                                          | 7 | 77,78%  | 28 | 77,78% |       |
| CRP                                                            | <5mg/L                                            | 9 | 100,00% | 32 | 88,89% | 0.694 |
|                                                                | >=5mg/L                                           | 0 | 0,00%   | 4  | 11,11% |       |
| RF                                                             | minus                                             | 9 | 100,00% | 33 | 91,67% | 0.882 |
|                                                                | plus                                              | 0 | 0,00%   | 3  | 8,33%  |       |
| physical activity                                              | No                                                | 2 | 22,22%  | 14 | 38,89% | 0.586 |
|                                                                | any kind of                                       | 7 | 77,78%  | 22 | 61,11% |       |
| physical activity                                              | No                                                | 5 | 55,56%  | 21 | 58,33% | 0.821 |
|                                                                | >= 3 days/week                                    | 4 | 44,44%  | 15 | 41,67% |       |
| number of days<br>with physical<br>activity >60 min<br>per day | 0                                                 | 2 | 22,22%  | 14 | 38,89% | 0.853 |
|                                                                | 1                                                 | 2 | 22,22%  | 2  | 5,56%  |       |
|                                                                | 2                                                 | 1 | 11,11%  | 5  | 13,89% |       |
|                                                                | 3                                                 | 1 | 11,11%  | 5  | 13,89% |       |
|                                                                | 4                                                 | 1 | 11,11%  | 3  | 8,33%  |       |
|                                                                | 5                                                 | 0 | 0,00%   | 1  | 2,78%  |       |

|                                           |       |   |         |    |         |       |
|-------------------------------------------|-------|---|---------|----|---------|-------|
|                                           | 6     | 0 | 0,00%   | 0  | 0,00%   |       |
|                                           | 7     | 2 | 22,22%  | 6  | 16,67%  |       |
| Physical activity 7 days a week > 60 min  | No    | 7 | 77,78%  | 30 | 83,33%  | 0.920 |
|                                           | Yes   | 2 | 22,22%  | 6  | 16,67%  |       |
| Sedetary screen time before Covid pandemy | < 3h  | 2 | 22,22%  | 12 | 33,33%  | 0.810 |
|                                           | >= 3h | 7 | 77,78%  | 24 | 66,67%  |       |
| Sedetary screen time in Covid pandemy     | < 3h  | 0 | 0,00%   | 0  | 0,00%   | ----- |
|                                           | >= 3h | 9 | 100,00% | 36 | 100,00% |       |
| Better eating habits*                     | No    | 8 | 88,89%  | 30 | 83,33%  | 0.916 |
|                                           | Yes   | 1 | 11,11%  | 6  | 16,67%  |       |

\* fruit or vegetables daily, fish >= 1 time/week, sweetened drinks less than 1 time/week

cIMT—carotid intima-media thickness; BMI—body mass index; ESR—erythrocytes sedimentation rate; CRP—C-reactive protein; RCA—right carotid artery; LCA—left carotid artery. 1—Abnormal BMI encompasses patients with one of the following: underweight (<5th percentile); overweight (>85th percentile); obesity (>95th percentile); 2—Abnormal lipid panel encompasses patients with at least one of the following: total cholesterol  $\geq 170$  mg/dL; high-density lipoprotein  $\leq 40$  mg/dL; low-density lipoprotein  $\geq 110$  mg/dL; triglycerides 0-9 years >100 mg/dl, 10-19 years >130 mg/dl; Vas- Visual Analog Scale of pain; AGA- appropriate for gestational age; LGA –large for gestational age; SGA-small for gestational age;

**Table S4. Numbers of cases in the control group divided according to good\* and bad eating habits**

\* fruit or vegetables daily, fish >= 1 time/week, sweetened drinks less than 1 time/week

|  |                            |                            |   |
|--|----------------------------|----------------------------|---|
|  | Better eating habits (N=3) | Worse eating habits (N=34) | p |
|--|----------------------------|----------------------------|---|

|             |          | Number | Percent | Number | Percent |       |
|-------------|----------|--------|---------|--------|---------|-------|
| Sex         | F        | 1      | 33,33%  | 22     | 64,71%  | 0.651 |
|             | M        | 2      | 66,67%  | 12     | 35,29%  |       |
| RCA centile | < 25     | 1      | 33,33%  | 11     | 32,35%  | 0.841 |
|             | 25 – 74  | 2      | 66,67%  | 16     | 47,06%  |       |
|             | 75 – 94  | 0      | 0,00%   | 7      | 20,59%  |       |
|             | >= 95    | 0      | 0,00%   | 0      | 0,00%   |       |
| RCA centile | < 75 cc  | 3      | 100,00% | 27     | 79,41%  | 0.916 |
|             | >= 75 cc | 0      | 0,00%   | 7      | 20,59%  |       |
| LCA centile | < 25     | 1      | 33,33%  | 11     | 32,35%  | 0.841 |
|             | 25 – 74  | 2      | 66,67%  | 16     | 47,06%  |       |
|             | 75 – 94  | 0      | 0,00%   | 7      | 20,59%  |       |
|             | >= 95    | 0      | 0,00%   | 0      | 0,00%   |       |
| LCA centile | < 75 cc  | 3      | 100,00% | 27     | 79,41%  | 0.916 |
|             | >= 75 cc | 0      | 0,00%   | 7      | 20,59%  |       |
| cIMT        | <95      | 3      | 100,00% | 34     | 100,00% | ----- |
|             | >=95     | 0      | 0,00%   | 0      | 0,00%   |       |
| Apgar score | 1        | 0      | 0,00%   | 0      | 0,00%   | 0.999 |
|             | 2        | 0      | 0,00%   | 1      | 2,94%   |       |
|             | 3        | 0      | 0,00%   | 0      | 0,00%   |       |
|             | 4        | 0      | 0,00%   | 0      | 0,00%   |       |
|             | 5        | 0      | 0,00%   | 0      | 0,00%   |       |
|             | 6        | 0      | 0,00%   | 0      | 0,00%   |       |
|             | 7        | 0      | 0,00%   | 0      | 0,00%   |       |
|             | 8        | 1      | 33,33%  | 6      | 17,65%  |       |
|             | 9        | 1      | 33,33%  | 10     | 29,41%  |       |

|                                                |                       |   |         |    |         |       |
|------------------------------------------------|-----------------------|---|---------|----|---------|-------|
|                                                | 10                    | 1 | 33,33%  | 17 | 50,00%  |       |
| Type of weight<br>after childbirth             | AGA                   | 2 | 66,67%  | 31 | 91,18%  | 0.079 |
|                                                | LGA                   | 0 | 0,00%   | 2  | 5,88%   |       |
|                                                | SGA                   | 1 | 33,33%  | 1  | 2,94%   |       |
| BMI                                            | Underweight           | 0 | 0,00%   | 0  | 0,00%   | 0.918 |
|                                                | Appropriate body mass | 2 | 66,67%  | 27 | 79,41%  |       |
|                                                | Overweight            | 1 | 33,33%  | 6  | 17,65%  |       |
|                                                | Obesity               | 0 | 0,00%   | 1  | 2,94%   |       |
| BMI                                            | normal                | 2 | 66,67%  | 27 | 79,41%  | 0.828 |
|                                                | abnormal              | 1 | 33,33%  | 7  | 20,59%  |       |
| BMI < 85                                       | YES                   | 2 | 66,67%  | 27 | 79,41%  | 0.828 |
|                                                | NO                    | 1 | 33,33%  | 7  | 20,59%  |       |
| RR                                             | <90 percentil         | 3 | 100,00% | 33 | 97,06%  | 0.956 |
|                                                | 90-95 percentil       | 0 | 0,00%   | 1  | 2,94%   |       |
|                                                | >95 percentil         | 0 | 0,00%   | 0  | 0,00%   |       |
| Ideal<br>cardiovascular<br>health              | YES                   | 0 | 0,00%   | 0  | 0,00%   | ----- |
|                                                | NO                    | 3 | 100,00% | 34 | 100,00% |       |
| Passive smoking                                | NO                    | 2 | 66,67%  | 34 | 100,00% | 0.806 |
|                                                | YES                   | 1 | 33,33%  | 4  | 11,76%  |       |
| Smoking parents                                | NO                    | 3 | 100,00% | 31 | 91,18%  | 0.571 |
|                                                | YES                   | 0 | 0,00%   | 3  | 8,82%   |       |
| Family history of<br>cardiovascular<br>disease | NO                    | 2 | 66,67%  | 17 | 50,00%  | 0.964 |
|                                                | YES                   | 1 | 33,33%  | 17 | 50,00%  |       |
| Uric acid                                      | <4mg/L                | 2 | 66,67%  | 17 | 50,00%  | 0.964 |



|                   |                                                   |   |         |    |        |       |
|-------------------|---------------------------------------------------|---|---------|----|--------|-------|
|                   | >=4mg/L                                           | 1 | 33,33%  | 17 | 50,00% |       |
| Fasting glucose   | <100 mg/L                                         | 3 | 100,00% | 33 | 97,06% | 0.120 |
|                   | >=100mg/L                                         | 0 | 0,00%   | 1  | 2,94%  |       |
| HDL               | <40 mg/dl                                         | 0 | 0,00%   | 2  | 5,88%  | 0.729 |
|                   | >45 mg/dl                                         | 3 | 100,00% | 28 | 82,35% |       |
|                   | 40-45 mg/dl                                       | 0 | 0,00%   | 4  | 11,76% |       |
| HDL               | <40mg/dl                                          | 0 | 0,00%   | 2  | 5,88%  | 0.368 |
|                   | >45 mg/dl                                         | 3 | 100,00% | 32 | 94,12% |       |
|                   | 40-45 mg/dl                                       |   |         |    |        |       |
| LDL               | <110 mg/dl                                        | 0 | 0,00%   | 19 | 55,88% | 0.123 |
|                   | 110-129mg/dl                                      | 1 | 33,33%  | 8  | 23,53% |       |
|                   | >130 mg/dl                                        | 2 | 66,67%  | 7  | 20,59% |       |
| TC                | <170 mg/dl                                        | 1 | 33,33%  | 21 | 61,76% | 0.478 |
|                   | 170-199 mg/dl                                     | 2 | 66,67%  | 11 | 32,35% |       |
|                   | >200 mg/dl                                        | 0 | 0,00%   | 2  | 5,88%  |       |
| Triglycerides     | 0-9 years <75 mg/dl<br>10-19 years <90 mg/dl      | 1 | 33,33%  | 21 | 61,76% | 0.257 |
|                   | 0-9 years 75-99 mg/dl<br>10-19 years 90-129 mg/dl | 2 | 66,67%  | 8  | 23,53% |       |
|                   | 0-9 years >100 mg/dl<br>10-19 years >130 mg/dl    | 0 | 0,00%   | 5  | 14,71% |       |
| Lipid profile     | normal                                            | 0 | 0,00%   | 9  | 26,47% | 0.747 |
|                   | abnormal                                          | 3 | 100,00% | 25 | 73,53% |       |
| physical activity | No                                                | 0 | 0,00%   | 7  | 20,59% | 0.916 |
|                   | any kind of                                       | 3 | 100,00% | 27 | 79,41% |       |

|                                                                |                |   |         |    |         |       |
|----------------------------------------------------------------|----------------|---|---------|----|---------|-------|
| physical activity                                              | No             | 0 | 0,00%   | 22 | 64,71%  | 0.115 |
|                                                                | >= 3 days/week | 3 | 100,00% | 12 | 35,29%  |       |
| number of days<br>with physical<br>activity >60 min<br>per day | 0              | 0 | 0,00%   | 7  | 20,59%  | 0.015 |
|                                                                | 1              | 0 | 0,00%   | 7  | 20,59%  |       |
|                                                                | 2              | 0 | 0,00%   | 8  | 23,53%  |       |
|                                                                | 3              | 1 | 33,33%  | 2  | 5,88%   |       |
|                                                                | 4              | 0 | 0,00%   | 3  | 8,82%   |       |
|                                                                | 5              | 0 | 0,00%   | 3  | 8,82%   |       |
|                                                                | 6              | 1 | 33,33%  | 0  | 0,00%   |       |
|                                                                | 7              | 1 | 33,33%  | 4  | 11,76%  |       |
| Physical activity 7<br>days a week > 60<br>min                 | No             | 2 | 66,67%  | 30 | 88,24%  | 0.867 |
|                                                                | Yes            | 1 | 33,33%  | 4  | 11,76%  |       |
| Sedetary screen<br>time before Covid<br>pandemy                | < 3h           | 2 | 66,67%  | 8  | 23,53%  | 0.350 |
|                                                                | >= 3h          | 1 | 33,33%  | 26 | 76,47%  |       |
| Sedetary screen<br>time in Covid<br>pandemy                    | < 3h           | 0 | 0,00%   | 0  | 0,00%   | ----- |
|                                                                | >= 3h          | 3 | 100,00% | 34 | 100,00% |       |

cIMT—carotid intima-media thickness; BMI—body mass index; ESR—erythrocytes sedimentation rate; CRP—C-reactive protein; RCA—right carotid artery; LCA—left carotid artery. 1—Abnormal BMI encompasses patients with one of the following: underweight (<5th percentile); overweight (>85th percentile); obesity (>95th percentile); 2—Abnormal lipid panel encompasses patients with at least one of the following: total cholesterol  $\geq$  170 mg/dL; high-density lipoprotein  $\leq$  40 mg/dL; low-density lipoprotein  $\geq$  110 mg/dL; triglycerides 0-9 years >100 mg/dl, 10-19 years >130 mg/dl; AGA- appropriate for gestational age; LGA –large for gestational age; SGA-small for gestational age;
